# Supplementary material for: Highly efficient catalytic transfer hydrogenolysis for the conversion of Kraft lignin into bio-oil over heteropoly acids
Source: Royal Society of Chemistry journal article supplement (doi:10.1039/d2gc01808j), 2022-01-01
Supplement: d2gc01808j1.pdf [file d2gc01808j1.pdf]

Supporting Information for:

**Highly efficient catalytic transfer hydrogenolysis for the conversion  
of Kraft lignin into bio-oil over heteropoly acids**

Haichuan Zhang and Shiyu Fu\*

State Key Laboratory of Pulp and Paper Engineering, South China University of  
Technology, Guangzhou, Guangdong Province 510640, PR China

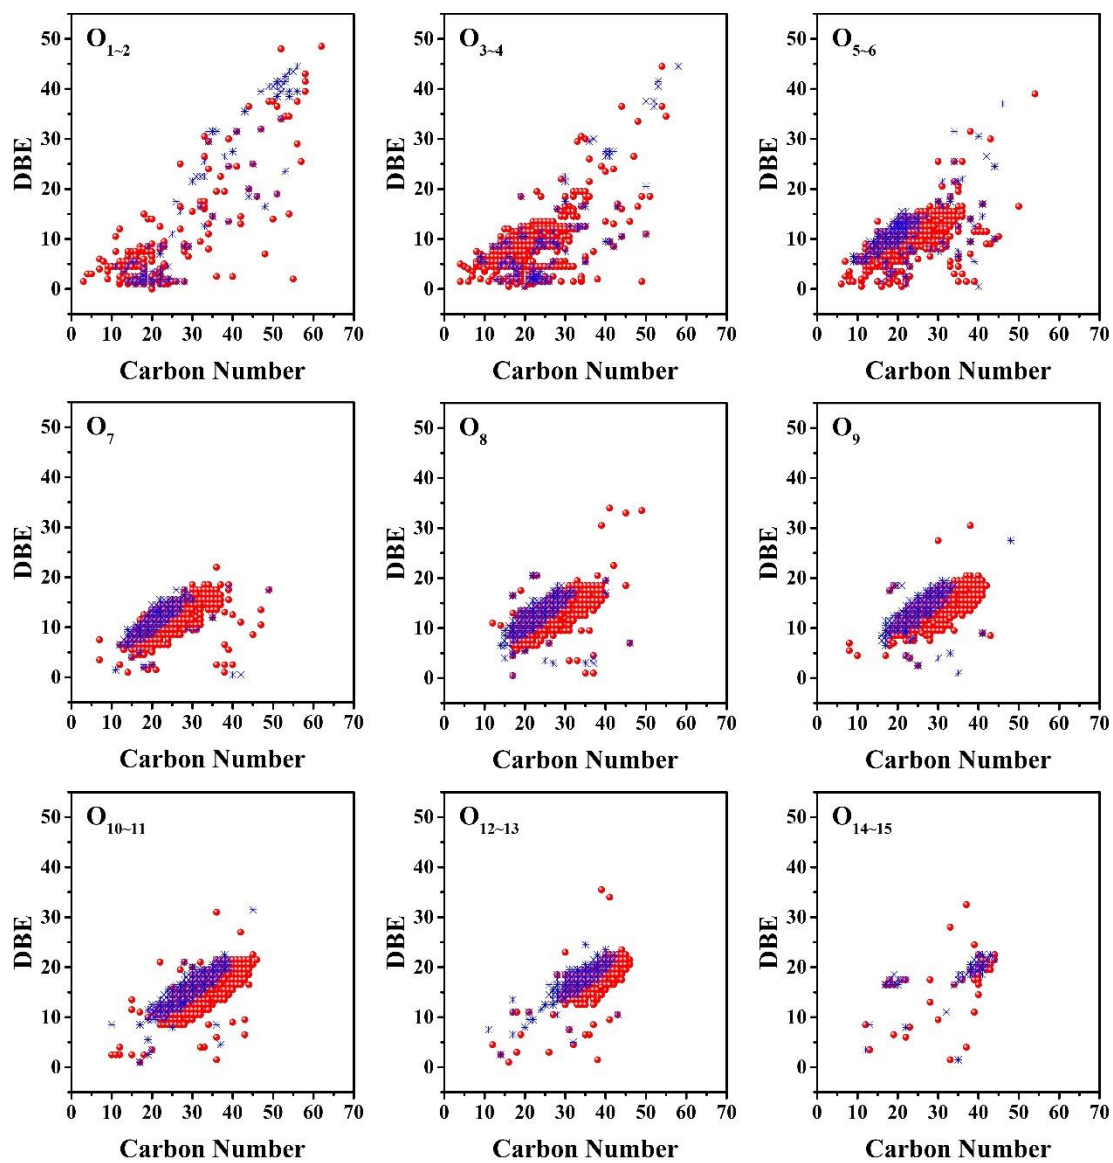

**Fig. S1** Double bond equivalent (DBE) vs. carbon number plots for oxygen class compounds in EKL (※) and lignin oil (●), observed with negative-ion ESI.



**Table S1** Assignments of the main  $^{13}\text{C}$ - $^1\text{H}$  correlation signals in the HSQC spectra<sup>[1]</sup>

| Labels              | Chemical shift<br>$\delta_{\text{C}}/\delta_{\text{H}}$ (ppm) | Assignments                                                                                                              |
|---------------------|---------------------------------------------------------------|--------------------------------------------------------------------------------------------------------------------------|
| $\text{A}_{\alpha}$ | 85.8/4.65                                                     | $\text{C}_{\alpha}\text{-H}_{\alpha}$ in resinol substructures                                                           |
| $\text{A}_{\beta}$  | 54.1/3.07                                                     | $\text{C}_{\beta}\text{-H}_{\beta}$ in resinol substructures                                                             |
| $\text{OCH}_3$      | 56.2/3.73                                                     | C–H in methoxyls                                                                                                         |
| $\text{B}_{\alpha}$ | 71.5/4.75                                                     | $\text{C}_{\alpha}\text{-H}_{\alpha}$ in $\beta\text{-O-4'}$ linked to G units                                           |
| $\text{B}_{\alpha}$ | 72.2/4.98                                                     | $\text{C}_{\alpha}\text{-H}_{\alpha}$ in $\beta\text{-O-4'}$ linked to S units                                           |
| $\text{B}'_{\beta}$ | 81.9.2/4.77                                                   | $\text{C}_{\beta}\text{-H}_{\beta}$ in $\beta\text{-O-4'}$ substructures with a conjugated carbonyl<br>or carboxyl group |
| $\text{X}_1$        | 102.2/4.29                                                    | $\text{C}_1\text{-H}_1$ in xylan                                                                                         |
| $\text{X}_2$        | 73.1/3.14                                                     | $\text{C}_2\text{-H}_2$ in xylan                                                                                         |
| $\text{X}_3$        | 74.6/3.34                                                     | $\text{C}_3\text{-H}_3$ in xylan                                                                                         |
| $\text{X}_4$        | 75.9/3.58                                                     | $\text{C}_4\text{-H}_4$ in xylan                                                                                         |
| $\text{S}_{2,6}$    | 104.0/6.62,<br>6.86<br>105.3/7.00,<br>7.10<br>106.6/7.26      | $\text{C}_{2,6}\text{-H}_{2,6}$ in syringyl units                                                                        |
| $\text{S}'_{2,6}$   | 107.7/7.22<br>108.5/7.22<br>109.7/7.15                        | $\text{C}_{2,6}\text{-H}_{2,6}$ in oxidized ( $\text{C}\alpha=\text{O}$ ) syringyl units                                 |
| $\text{G}_2$        | 112.9/6.80                                                    | $\text{C}_2\text{-H}_2$ in guaiacyl units                                                                                |
| $\text{G}_5$        | 115.6/6.74                                                    | $\text{C}_5\text{-H}_5$ in guaiacyl units                                                                                |
| $\text{G}_6$        | 120.2/6.76<br>121.0/7.23                                      | $\text{C}_6\text{-H}_6$ in guaiacyl units                                                                                |

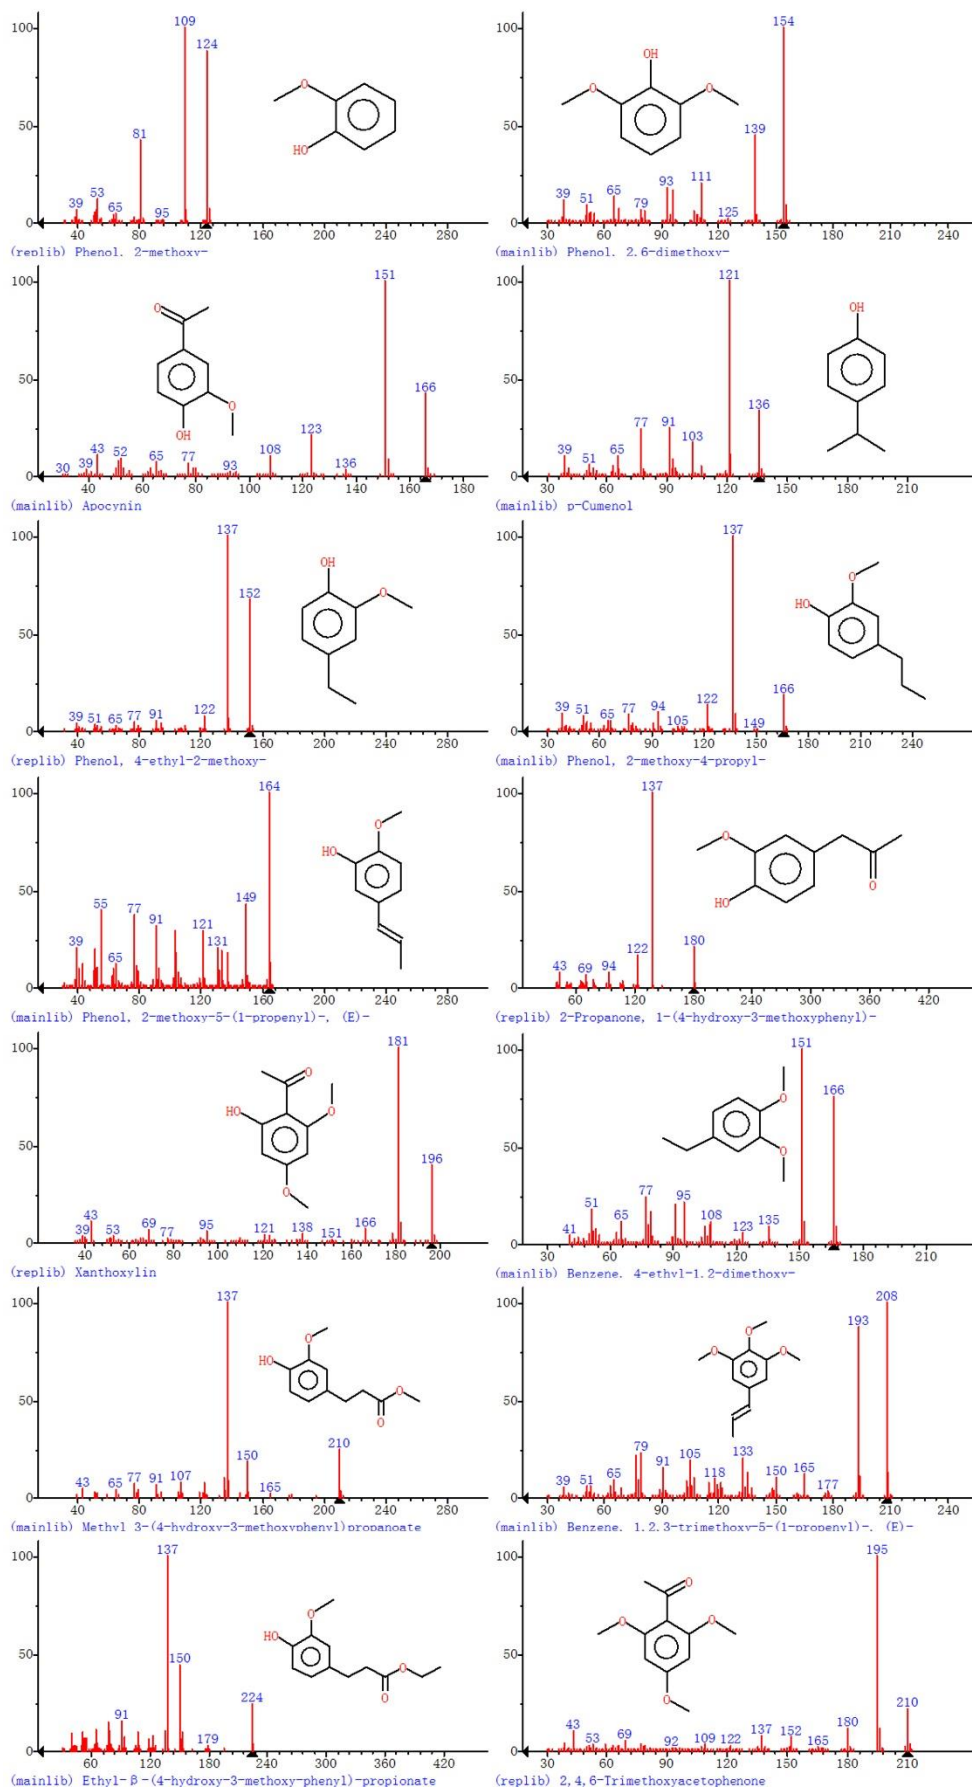

**Fig. S3** Mass spectra for the main monomer products from lignin oil

## References

- [1] a) C. Fernández-Costas, S. Gouveia, M. A. Sanromán, D. Moldes, *Biomass and Bioenergy* **2014**, *63*, 156-166; b) H. Zhang, Y. Bai, B. Yu, X. Liu, F. Chen, *Green Chemistry* **2017**, *19*, 5152-5162.
